# Supplementary material
Source: PubMed Central journal article supplement (PMC2758387)
Supplement: 11103_2007_9274_MOESM13_ESM.pdf [file 11103_2007_9274_MOESM13_ESM.pdf]

**Supplementary Table 5.** Transcript specifically responsive to MV, significantly elevated/suppressed (>3-fold).

| Probe set name | Gene      | TAIR description                                                                                                                                                                                                                                      | Ratio log <sub>2</sub> MV 2 h/ control |
|----------------|-----------|-------------------------------------------------------------------------------------------------------------------------------------------------------------------------------------------------------------------------------------------------------|----------------------------------------|
| 261443_at      | At1g28480 | glutaredoxin, putative similar to glutaredoxin GI:2244924 from [Arabidopsis thaliana]; supported by cDNA: gi_13358219_gb_AF325030.2_AF325030                                                                                                          | 3.365                                  |
| 261394_at      | At1g79680 | wall-associated kinase 2, putative similar to wall-associated kinase 2 GI:4826399 from [Arabidopsis thaliana]                                                                                                                                         | 3.283                                  |
| 245005_at      | rps14     | ribosomal protein S14                                                                                                                                                                                                                                 | 3.086                                  |
| 261899_at      | At1g80820 | cinnamoyl CoA reductase, putative similar to cinnamoyl CoA reductase GB:AAF43141 GI:7239228 from [Populus tremuloides]; supported by full-length cDNA: Ceres: 32255.                                                                                  | 3.071                                  |
| 244990_s_at    | rpl23-01  | hypothetical protein                                                                                                                                                                                                                                  | 2.899                                  |
| 250149_at      | At5g14700 | cinnamoyl CoA reductase - like protein cinnamoyl CoA reductase, Populus tremuloides, EMBL:AF217958; supported by full-length cDNA: Ceres:17229.                                                                                                       | 2.842                                  |
| 260005_at      | At1g67920 | unknown protein; supported by full-length cDNA: Ceres:13102.                                                                                                                                                                                          | 2.834                                  |
| 256306_at      | At1g30370 | lipase, putative contains Pfam profile: PF01764: Lipase                                                                                                                                                                                               | 2.833                                  |
| 263783_at      | At2g46400 | member of WRKY Transcription Factor; Group III, WRKY46                                                                                                                                                                                                | 2.726                                  |
| 260668_at      | At1g19530 | unknown protein; supported by full-length cDNA: Ceres:39579.                                                                                                                                                                                          | 2.606                                  |
| 247293_at      | At5g64510 | putative protein similar to unknown protein (pir [T03813])                                                                                                                                                                                            | 2.599                                  |
| 261474_at      | At1g14540 | anionic peroxidase, putative similar to anionic peroxidase GI:170202 from [Nicotiana glauca]                                                                                                                                                          | 2.549                                  |
| 249264_s_at    | At5g41740 | disease resistance protein-like                                                                                                                                                                                                                       | 2.548                                  |
| 267451_at      | At2g33710 | member of the ERF (ethylene response factor) subfamily B-4 of ERF/AP2 transcription factor family                                                                                                                                                     | 2.513                                  |
| 259428_at      | At1g01560 | MAP kinase, putative similar to MAP kinase 5 GI:4239889 from [Zea mays]                                                                                                                                                                               | 2.487                                  |
| 259792_at      | At1g29690 | Significant homology to the MACPF (membrane attack complex and perforin) domain of complements and perforin proteins                                                                                                                                  | 2.464                                  |
| 252487_at      | At3g46660 | glucosyltransferase-like protein UDP-glucose glucosyltransferase - Arabidopsis thaliana, EMBL:AB016819; supported by cDNA: gi_15081808_gb_AY048297.1_                                                                                                 | 2.438                                  |
| 256181_at      | At1g51820 | light repressible receptor protein kinase, putative similar to light repressible receptor protein kinase GI:1321686 from (Arabidopsis thaliana)                                                                                                       | 2.419                                  |
| 267384_at      | At2g44370 | DC1 domain-containing protein; similar to DC1 domain-containing protein [Arabidopsis thaliana] (TAIR:AT2G17740.1)                                                                                                                                     | 2.396                                  |
| 252345_at      | At3g48640 | hypothetical protein                                                                                                                                                                                                                                  | 2.383                                  |
| 261037_at      | At1g17420 | lipoxxygenase identical to GB:CAB56692 from (Arabidopsis thaliana)                                                                                                                                                                                    | 2.380                                  |
| 245209_at      | At5g12340 | putative protein similarity to predicted protein, Arabidopsis thaliana                                                                                                                                                                                | 2.344                                  |
| 252346_at      | At3g48650 | At14a-related protein, similar to At14a (GI:11994571 and GI:11994573) (Arabidopsis thaliana)                                                                                                                                                          | 2.328                                  |
| 248814_at      | At5g46910 | transcription factor jumonji (jmj) family protein; similar to REF6 (RELATIVE OF EARLY FLOWERING 6), transcription factor [Arabidopsis thaliana] (TAIR:AT3G48430.1)                                                                                    | 2.318                                  |
| 250796_at      | At5g05300 | putative protein similar to unknown protein (gb)AAF01528.1)                                                                                                                                                                                           | 2.298                                  |
| 263570_at      | At2g27150 | aldehyde oxidase identical to GP:3172044:gnl:PID:d1029570:AB010080; supported by cDNA: gi_5672671_dbj_AB016622.1_AB016622                                                                                                                             | 2.285                                  |
| 247215_at      | At5g64905 | PROPEP3 (Elicitor peptide 3 precursor); Identical to Elicitor peptide 3 precursor (PEP3) [Arabidopsis Thaliana]; supported by full-length cDNA: Ceres: 3657.                                                                                          | 2.256                                  |
| 259298_at      | At3g05370 | putative disease resistance protein similar to Cf-2 disease resistance protein GB:AAC15780 from [Lycopersicon pimpinellifolium]                                                                                                                       | 2.228                                  |
| 247145_at      | At5g65600 | receptor protein kinase-like protein                                                                                                                                                                                                                  | 2.217                                  |
| 251054_at      | At5g01540 | receptor like protein kinase receptor like protein kinase - Arabidopsis thaliana, EMBL:ATLECGENE; supported by cDNA: gi_13605542_gb_AF361597.1_AF361597                                                                                               | 2.162                                  |
| 265008_at      | At1g61560 | Mlo protein, putative similar to Mlo protein GI:1877220 from [Hordeum vulgare]; supported by cDNA: gi_14091581_gb_AF369567.1_AF369567                                                                                                                 | 2.160                                  |
| 263228_at      | At1g30700 | putative reticuline oxidase-like protein similar to GB:P30986 from [Eschscholzia californica] ( berberine bridge-forming enzyme ), ESTs gb F19886, gb Z30784 and gb Z30785 come from this gene; supported by cDNA: gi_16930506_gb_AF419607.1_AF419607 | 2.156                                  |
| 258787_at      | At3g11840 | U-box domain-containing protein                                                                                                                                                                                                                       | 2.149                                  |
| 247848_at      | At5g58120 | resistance protein - like disease resistance protein RPP1-WsA, Arabidopsis thaliana, EMBL:AF098962                                                                                                                                                    | 2.135                                  |

|             |           |                                                                                                                                                                                                                                                                                     |       |
|-------------|-----------|-------------------------------------------------------------------------------------------------------------------------------------------------------------------------------------------------------------------------------------------------------------------------------------|-------|
| 262360_at   | At1g73080 | receptor protein kinase, putative similar to receptor protein kinase Gl:1389566 from [Arabidopsis thaliana]                                                                                                                                                                         | 2.122 |
| 265093_at   | At1g03905 | ABC transporter family protein; Identical to Non-intrinsic ABC protein 4 (GCN-related protein 2) (NAP4) [Arabidopsis Thaliana] (GB:Q3EDJ0;GB:Q9ZWB0); similar to POP1 [Arabidopsis thaliana] (TAIR:AT5G44110.1)                                                                     | 2.113 |
| 266992_at   | At2g39200 | similar to Mlo proteins from <i>H. vulgare</i> ; supported by cDNA: gi_14091593_gb_AF369573.1_AF369573                                                                                                                                                                              | 2.107 |
| 267381_at   | At2g26190 | calmodulin-binding family protein; similar to EDA39 (embryo sac development arrest 39), calmodulin binding [Arabidopsis thaliana] (TAIR:AT4G33050.3); supported by cDNA: gi_16930468_gb_AF419588.1_AF419588                                                                         | 2.100 |
| 251259_at   | At3g62260 | putative protein phosphoprotein phosphatase (EC 3.1.3.16) 1A-alpha - Homo sapiens, PIR:S22423; supported by full-length cDNA: Ceres:20050.                                                                                                                                          | 2.096 |
| 253181_at   | At4g35180 | amino acid permease - like protein Lily mRNA, <i>Lilium longiflorum</i> , gb:D21814; supported by full-length cDNA: Ceres:36461.                                                                                                                                                    | 2.090 |
| 258947_at   | At3g01830 | hypothetical protein similar to calmodulin-like protein GB:CAB42906 [Arabidopsis thaliana]; Pfam HMM hit: EF hand; supported by full-length cDNA: Ceres: 7252.                                                                                                                      | 2.085 |
| 252470_at   | At3g46930 | protein kinase 6-like protein protein kinase 6 - Glycine max, PIR2:S29851                                                                                                                                                                                                           | 2.082 |
| 265737_at   | At2g01180 | putative phosphatidic acid phosphatase; supported by full-length cDNA: Ceres:19163.                                                                                                                                                                                                 | 2.041 |
| 264660_at   | At1g09940 | putative glutamyl-tRNA reductase 2 precursor similar to GB:P49294 and to <i>A. thaliana</i> HEMA2 (gb U27118)                                                                                                                                                                       | 2.029 |
| 262930_at   | At1g65690 | hypothetical protein similar to hin1 GB:Y07563 Gl:1619320 <i>Nicotiana tabacum</i> ; supported by full-length cDNA: Ceres:21639.                                                                                                                                                    | 2.029 |
| 249339_at   | At5g41100 | DNA binding; similar to hydroxyproline-rich glycoprotein family protein [Arabidopsis thaliana] (TAIR:AT3G26910.2)                                                                                                                                                                   | 2.021 |
| 253737_at   | At4g28703 | Expressed protein; supported by full-length cDNA: Ceres: 38545.                                                                                                                                                                                                                     | 2.015 |
| 266615_s_at | At2g29720 | putative monooxygenase; supported by full-length cDNA: Ceres:34214.                                                                                                                                                                                                                 | 2.014 |
| 252533_at   | At3g46110 | putative protein predicted proteins, <i>Arabidopsis thaliana</i>                                                                                                                                                                                                                    | 1.995 |
| 257919_at   | At3g23250 | myb-related transcription factor, putative similar to myb-related transcription factor GB:CAA66952 from [ <i>Lycopersicon esculentum</i> ]                                                                                                                                          | 1.986 |
| 261650_at   | At1g27770 | envelope Ca2+-ATPase identical to envelope Ca2+-ATPase GB:AAD10212 Gl:516118 from ( <i>Arabidopsis thaliana</i> ); supported by cDNA: gi_493621_dbj_D13983.1_ATHRCECAA                                                                                                              | 1.976 |
| 246465_at   | At5g17000 | quinone oxidoreductase - like protein probable quinone oxidoreductase (EC 1.6.5.5) P1, <i>Arabidopsis thaliana</i> , PIR:S57611                                                                                                                                                     | 1.967 |
| 261476_at   | At1g14480 | hypothetical protein contains similarity to alpha-latroinsectotoxin precursor Gl:9537 from [ <i>Latrodectus tredecimguttatus</i> ]                                                                                                                                                  | 1.954 |
| 249903_at   | At5g22690 | disease resistance protein-like                                                                                                                                                                                                                                                     | 1.938 |
| 267289_at   | At2g23770 | putative protein kinase contains a protein kinase domain profile (PDOC00100)                                                                                                                                                                                                        | 1.937 |
| 251109_at   | At5g01600 | ferritin 1 precursor; supported by full-length cDNA: Ceres:1100.                                                                                                                                                                                                                    | 1.937 |
| 257074_at   | At3g19660 | unknown protein                                                                                                                                                                                                                                                                     | 1.932 |
| 260239_at   | At1g74360 | putative receptor protein kinase similar to brassinosteroid insensitive 1 GB:AAC49810 (putative receptor protein kinase); contains Pfam profiles: PF00560 Leucine Rich Repeat (17 repeats), PF00069 Eukaryotic protein kinase domain; supported by cDNA: gi_15810516_gb_AY056297.1_ | 1.930 |
| 266775_at   | At2g29060 | putative SCARECROW gene regulator                                                                                                                                                                                                                                                   | 1.916 |
| 246327_at   | At1g16670 | receptor-like serine/threonine kinase, putative similar to receptor-like serine/threonine kinase Gl:2465923 from [Arabidopsis thaliana]; supported by cDNA: gi_16649102_gb_AY059921.1_                                                                                              | 1.907 |
| 260869_at   | At1g43800 | stearoyl acyl carrier protein desaturase, putative similar to stearoyl acyl carrier protein desaturase Lldd3A20 GB: AAD28287 Gl:4704824 from [ <i>Lupinus luteus</i> ]; supported by full-length cDNA: Ceres:12758.                                                                 | 1.861 |
| 251428_at   | At3g60140 | beta-glucosidase-like protein several beta-glucosidases - different species; supported by cDNA: gi_10834547_gb_AF159376.1_AF159376                                                                                                                                                  | 1.861 |
| 259297_at   | At3g05360 | putative disease resistance protein similar to Cf-2 disease resistance protein GB:AAC15780 from [ <i>Lycopersicon pimpinellifolium</i> ]                                                                                                                                            | 1.843 |
| 264083_at   | At2g31230 | ethylene reponse factor-like AP2 domain transcription factor                                                                                                                                                                                                                        | 1.833 |
| 263230_at   | At1g05665 | putative indole-3-acetate beta-glucosyltransferase similar to indole-3-acetate beta-glucosyltransferase GB:AAD32293                                                                                                                                                                 | 1.827 |
| 265327_at   | At2g18210 | unknown protein                                                                                                                                                                                                                                                                     | 1.795 |
| 246001_at   | At5g20790 | putative protein predicted protein, <i>Arabidopsis thaliana</i> ; supported by full-length cDNA: Ceres:267031.                                                                                                                                                                      | 1.793 |
| 254652_at   | At4g18170 | member of WRKY Transcription Factor; Group II-c, WRKY28                                                                                                                                                                                                                             | 1.792 |
| 252825_at   | At4g39890 | small GTP-binding protein - like SR1 Nt-rab6, <i>Nicotiana tabacum</i> , L29273; supported by cDNA: gi_14423429_gb_AF386952.1_AF386952                                                                                                                                              | 1.786 |
| 256968_at   | At3g21070 | Encodes a protein with NAD(H) kinase activity.                                                                                                                                                                                                                                      | 1.784 |

|             |           |                                                                                                                                                                                                                                                                                                |       |
|-------------|-----------|------------------------------------------------------------------------------------------------------------------------------------------------------------------------------------------------------------------------------------------------------------------------------------------------|-------|
| 246108_at   | At5g28630 | putative protein retinal glutamic acid-rich protein, bovine, PIR:A40437; supported by full-length cDNA: Ceres:24151.                                                                                                                                                                           | 1.780 |
| 264953_at   | At1g77120 | alcohol dehydrogenase identical to alcohol dehydrogenase GI:469467 from ( <i>Arabidopsis thaliana</i> ); supported by full-length cDNA: Ceres: 4033.                                                                                                                                           | 1.779 |
| 254215_at   | At4g23700 | putative Na <sup>+</sup> /H <sup>+</sup> -exchanging protein Na <sup>+</sup> /H <sup>+</sup> -exchanging protein slr1595 - <i>Synechocystis</i> sp., EMBL:D90902                                                                                                                               | 1.778 |
| 266155_at   | At1g64950 | cytochrome p450, putative similar to cytochrome p450 GI:438242 from [ <i>Solanum melongena</i> ]; supported by cDNA: gi_14334809_gb_AY035078.1_                                                                                                                                                | 1.775 |
| 258682_at   | At3g08720 | putative ribosomal-protein S6 kinase (ATPK19) identical to putative ribosomal-protein S6 kinase (ATPK19) GB:D42061 [ <i>Arabidopsis thaliana</i> ] (FEBS Lett. 358 (2), 199-204 (1995)); supported by cDNA: gi_15292784_gb_AY050826.1_                                                         | 1.774 |
| 252214_at   | At3g50260 | putative protein EREBP-3 homolog, <i>Stylosanthes hamata</i> , EMBL:U91982; supported by cDNA: gi_15010555_gb_AY045579.1_                                                                                                                                                                      | 1.769 |
| 265797_at   | At2g35710 | glycogenin glucosyltransferase (glycogenin)-related; similar to glycogenin glucosyltransferase (glycogenin)-related [ <i>Arabidopsis thaliana</i> ] (TAIR:AT4G16600.1); supported by full-length cDNA: Ceres: 9996.                                                                            | 1.768 |
| 256583_at   | At3g28850 | glutaredoxin family protein; similar to glutaredoxin family protein [ <i>Arabidopsis thaliana</i> ] (TAIR:AT5G39865.1)                                                                                                                                                                         | 1.757 |
| 257644_at   | At3g25780 | Encodes allene oxide cyclase (AOC3), one of the enzymes involved in jasmonic acid biosynthesis; supported by full-length cDNA: Ceres:3457.                                                                                                                                                     | 1.756 |
| 252652_at   | At3g44720 | putative chloroplast prephenate dehydratase similar to bacterial PheA gene products                                                                                                                                                                                                            | 1.754 |
| 252414_at   | At3g47420 | putative protein sn-glycerol-3-phosphate permease - <i>Haemophilus influenzae</i> , PID:g3603157; supported by cDNA: gi_13430515_gb_AF360170.1_AF360170                                                                                                                                        | 1.751 |
| 256266_at   | At3g12310 | unknown protein; supported by cDNA: gi_15293280_gb_AY051074.1_                                                                                                                                                                                                                                 | 1.751 |
| 260015_at   | At1g67980 | putative S-adenosyl-L-methionine:trans-caffeoyl-Coenzyme A 3-O-methyltransferase similar to S-adenosyl-L-methionine:trans-caffeoyl-Coenzyme A 3-O-methyltransferase GB:AAA62426 [ <i>Arabidopsis thaliana</i> ] (function=disease resistance); supported by cDNA: gi_682727_gb_L40031.1_ATHORF | 1.745 |
| 245151_at   | At2g47550 | putative pectinesterase; supported by full-length cDNA: Ceres:111254.                                                                                                                                                                                                                          | 1.742 |
| 265276_at   | At2g28400 | hypothetical protein predicted by genscan and genefinder                                                                                                                                                                                                                                       | 1.731 |
| 264867_at   | At1g24150 | Formin homologue 4 (ATFH4); encodes a group I formin. Localized to cell junctions. Polymerizes actin. Binds profilin.                                                                                                                                                                          | 1.724 |
| 251479_at   | At3g59700 | serine/threonine-specific kinase lecRK1 precursor, lectin receptor-like                                                                                                                                                                                                                        | 1.717 |
| 244953_s_at | nad6      | NADH dehydrogenase subunit 6                                                                                                                                                                                                                                                                   | 1.715 |
| 245119_at   | At2g41640 | unknown protein; supported by cDNA: gi_16930450_gb_AF419579.1_AF419579                                                                                                                                                                                                                         | 1.715 |
| 249032_at   | At5g44910 | putative protein contains similarity to disease resistance protein                                                                                                                                                                                                                             | 1.709 |
| 248322_at   | At5g52760 | heavy-metal-associated domain-containing protein; similar to heavy-metal-associated domain-containing protein [ <i>Arabidopsis thaliana</i> ] (TAIR:AT5G52750.1)                                                                                                                               | 1.704 |
| 252739_at   | At3g43250 | cell cycle control protein-related; similar to cell cycle control protein-related [ <i>Arabidopsis thaliana</i> ] (TAIR:AT2G32050.1)                                                                                                                                                           | 1.699 |
| 246340_s_at | At3g44860 | AtPP -like protein AtPP protein, <i>Brassica napus</i> , EMBL:BNA245479; supported by cDNA: gi_15293070_gb_AY050969.1_                                                                                                                                                                         | 1.683 |
| 246418_at   | At5g16960 | quinone oxidoreductase -like protein probable quinone oxidoreductase (EC 1.6.5.5) P1, <i>Arabidopsis thaliana</i> , PIR:S57611; supported by full-length cDNA: Ceres:7898.                                                                                                                     | 1.677 |
| 260662_at   | At1g19540 | 2-hydroxyisoflavone reductase, putative similar to PIR:T08106 from [ <i>Betula pendula</i> ]                                                                                                                                                                                                   | 1.669 |
| 262369_at   | At1g73010 | phosphoric monoester hydrolase; similar to phosphoric monoester hydrolase [ <i>Arabidopsis thaliana</i> ] (TAIR:AT1G17710.1); supported by full-length cDNA: Ceres:19976.                                                                                                                      | 1.665 |
| 256050_at   | At1g07000 | leucine zipper protein, putative similar to leucine zipper protein GI:10177020 from [ <i>Arabidopsis thaliana</i> ]                                                                                                                                                                            | 1.663 |
| 249260_at   | At5g41680 | Pto kinase interactor 1-like protein                                                                                                                                                                                                                                                           | 1.659 |
| 264757_at   | At1g61360 | receptor protein kinase (IRK1), putative similar to receptor protein kinase (IRK1) GI:836953 from [ <i>Ipomoea trifida</i> ]                                                                                                                                                                   | 1.658 |
| 247240_at   | At5g64660 | U-box domain-containing protein                                                                                                                                                                                                                                                                | 1.655 |
| 258752_at   | At3g09520 | ATEXO70H4; a member of EXO70 gene family, putative exocyst subunits, conserved in land plants.                                                                                                                                                                                                 | 1.650 |
| 252234_at   | At3g49780 | Phytosulfokine 3 precursor (ATPSK4), coding for a unique plant peptide growth factor; supported by full-length cDNA: Ceres: 40302.                                                                                                                                                             | 1.647 |
| 257785_at   | At3g26980 | geranylgeranylated protein, putative similar to ATGP4 GB:AAD00115 from [ <i>Arabidopsis thaliana</i> ]                                                                                                                                                                                         | 1.643 |
| 249485_at   | At5g39020 | receptor protein kinase - like protein receptor-protein kinase-like protein, <i>Arabidopsis thaliana</i> , PIR:T45786                                                                                                                                                                          | 1.642 |

|           |           |                                                                                                                                                                                                                                                       |        |
|-----------|-----------|-------------------------------------------------------------------------------------------------------------------------------------------------------------------------------------------------------------------------------------------------------|--------|
| 258941_at | At3g09940 | putative monodehydroascorbate reductase (NADH) similar to monodehydroascorbate reductase (NADH) GB:JU0182 [Cucumis sativus]; supported by full-length cDNA: Ceres: 11160.                                                                             | 1.638  |
| 255512_at | At3g05710 | SYNTAXIN 43 (SYP43); member of SYP4 Gene Family; supported by cDNA: gi_5059351_gb_AF154574.1_AF154574                                                                                                                                                 | 1.635  |
| 249072_at | At5g44060 | putative protein similar to unknown protein (gb AAD10670.1)                                                                                                                                                                                           | 1.635  |
| 251336_at | At3g61190 | Bon association protein 1 (BAP1); encodes a protein with a C2 domain that binds to BON1 in yeast two hybrid analyses; supported by full-length cDNA: Ceres:30454.                                                                                     | 1.631  |
| 252827_at | At4g39950 | cytochrome P450 - like protein cytochrome P450, Sinapis alba, AF069494; supported by cDNA: gi_15028134_gb_AY046017.1_                                                                                                                                 | 1.630  |
| 256793_at | At3g22160 | VQ motif-containing protein; similar to VQ motif-containing protein [Arabidopsis thaliana] (TAIR:AT4G15120.1); supported by full-length cDNA: Ceres:8081.                                                                                             | 1.629  |
| 255549_at | At4g01950 | Glycerol-3-phosphate acyltransferase 3 (gpat3); encodes a member of a family of proteins with glycerol-3-phosphate acyltransferase activity                                                                                                           | 1.627  |
| 260206_at | At1g70740 | putative protein kinase contains Pfam profile: PF00069 Eukaryotic protein kinase domain                                                                                                                                                               | 1.618  |
| 251603_at | At3g57760 | putative protein wall-associated kinase 1, Arabidopsis thaliana, AJ009696; supported by cDNA: gi_13937221_gb_AF372966.1_AF372966                                                                                                                      | 1.614  |
| 265620_at | At2g27310 | F-box family protein; similar to F-box family protein [Arabidopsis thaliana] (TAIR:AT2G36090.1)                                                                                                                                                       | 1.611  |
| 245329_at | At4g14360 | dehydration-responsive protein-related; similar to dehydration-responsive protein-related [Arabidopsis thaliana] (TAIR:AT1G04430.1); supported by full-length cDNA: Ceres: 37809.                                                                     | 1.608  |
| 247026_at | At5g67080 | protein kinase-like protein                                                                                                                                                                                                                           | 1.607  |
| 255568_at | At4g01250 | member of WRKY Transcription Factor; Group II-e, WRKY22                                                                                                                                                                                               | 1.605  |
| 262238_at | At1g48300 | similar to soluble diacylglycerol acyltransferase [Arachis hypogaea] (GB:AAX62735.1)                                                                                                                                                                  | -1.601 |
| 256598_at | At3g30180 | cytochrome P450 homolog, putative similar to cytochrome P450 homolog GB:U54770 GI:1421740 from [Lycopersicon esculentum]; supported by full-length cDNA: Ceres:11278.                                                                                 | -1.620 |
| 266322_at | At2g46690 | putative auxin-regulated protein                                                                                                                                                                                                                      | -1.649 |
| 257008_at | At3g14210 | myrosinase-associated protein, putative similar to GB:CAA71238 from [Brassica napus], contains Pfam profile:PF00657 Lipase/Acylhydrolase with GDSL-like motif; supported by cDNA: gi_15450434_gb_AY052318.1_                                          | -1.653 |
| 244932_at | AtC01060  | PSI 9KDa protein                                                                                                                                                                                                                                      | -1.654 |
| 263688_at | At1g26920 | unknown protein Location of EST 228A16T7A, gb N65686; supported by full-length cDNA: Ceres:24946.                                                                                                                                                     | -1.681 |
| 245861_at | At5g28300 | GTL1 - like protein GTL1, Arabidopsis thaliana, EMBL:ATAJ3215; supported by cDNA: gi_14423451_gb_AF386963.1_AF386963                                                                                                                                  | -1.690 |
| 262682_at | At1g75900 | anter-specific proline-rich -like protein (APG-like) similar to anter-specific proline-rich protein (APG) SP:P40602 [Arabidopsis thaliana (Mouse-ear cross)]; supported by cDNA: gi_15054385_gb_AY028611.1_                                           | -1.698 |
| 252607_at | At3g44990 | xyloglucan endo-transglycosylase; supported by cDNA: gi_15810248_gb_AY056163.1_                                                                                                                                                                       | -1.726 |
| 249309_at | At5g41410 | Homeodomain protein involved in ovule morphogenesis, BEL1                                                                                                                                                                                             | -1.735 |
| 248921_at | At5g45950 | GDSL-motif lipase/hydrolase-like protein                                                                                                                                                                                                              | -1.798 |
| 255028_at | At4g09890 | putative protein Arabidopsis thaliana chromosome II BAC T30B22 genomic sequence, gene T30B22.22, PID:g2529679                                                                                                                                         | -1.842 |
| 248961_at | At5g45650 | subtilisin-like protease                                                                                                                                                                                                                              | -1.992 |
| 267361_at | At2g39920 | acid phosphatase class B family protein; Identical to Hypothetical protein At2g39920 [Arabidopsis thaliana] (GB:O04195); similar to acid phosphatase, putative [Arabidopsis thaliana] (TAIR:AT4G25150.1); supported by full-length cDNA: Ceres:33701. | -2.002 |
| 246275_at | At4g36540 | BEE2 (BR ENHANCED EXPRESSION 2); DNA binding / transcription factor; similar to basic helix-loop-helix (bHLH) family protein                                                                                                                          | -2.047 |
| 247252_at | At5g64770 | unknown protein                                                                                                                                                                                                                                       | -2.115 |
| 263402_at | At2g04050 | MATE efflux family protein; similar to ATDTX1, antiporter/ multidrug efflux pump/ multidrug transporter/ transporter [Arabidopsis thaliana] (TAIR:AT2G04040.1)                                                                                        | -2.226 |
| 252965_at | At4g38860 | putative auxin-induced protein auxin-induced protein 10A, Glycine max., PIR2:JQ1099                                                                                                                                                                   | -2.459 |
| 256060_at | At1g07050 | hypothetical protein contains similarity to photoperiod sensitivity quantitative trait locus (Hd1) GI:11094203 from [Oryza sativa]; supported by full-length cDNA: Ceres:1955.                                                                        | -2.476 |
